# Supplementary material for: Direct Z-scheme copper cobaltite/covalent triazine-based framework heterojunction for efficient photocatalytic CO2 reduction under visible light
Source: Royal Society of Chemistry journal article supplement (doi:10.1039/d0se01504k), 2020-12-10
Supplement: d0se01504k1.pdf [file d0se01504k1.pdf]

## Supporting Information

# **Direct Z-scheme copper cobaltite/covalent triazine-based framework heterojunction for efficient photocatalytic CO<sub>2</sub> reduction under visible light**

*Guiyun Lin<sup>a</sup>, Long Sun<sup>a</sup>, Guocheng Huang<sup>a</sup>, Qiaoshan Chen<sup>a</sup>, Shengqiong Fang\*<sup>a</sup>,*

*Jinhong Bi\*<sup>a,b</sup>, Ling Wu<sup>b</sup>*

<sup>a</sup>Department of Environmental Science and Engineering, Fuzhou University, Minhou, Fujian 350108, P. R. China

<sup>b</sup>State Key Laboratory of Photocatalysis on Energy and Environment, Fuzhou University, Minhou, Fujian 350108, P. R. China

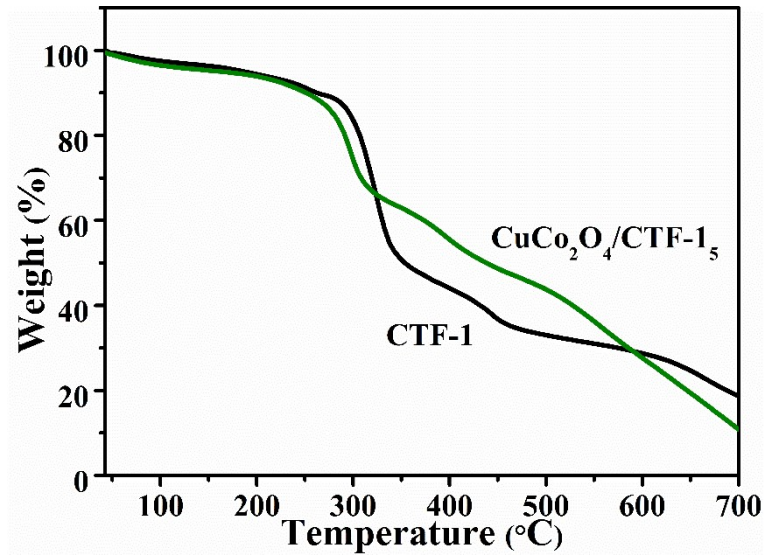

Fig. S1. TGA analysis of CTF-1 and CuCo<sub>2</sub>O<sub>4</sub>/CTF-1<sub>5</sub>.

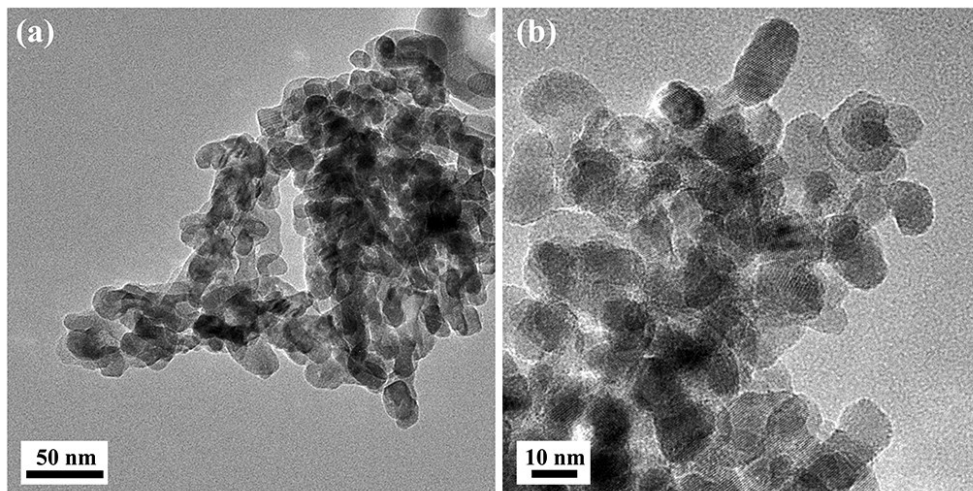

Fig. S2. TEM images of CuCo<sub>2</sub>O<sub>4</sub>.

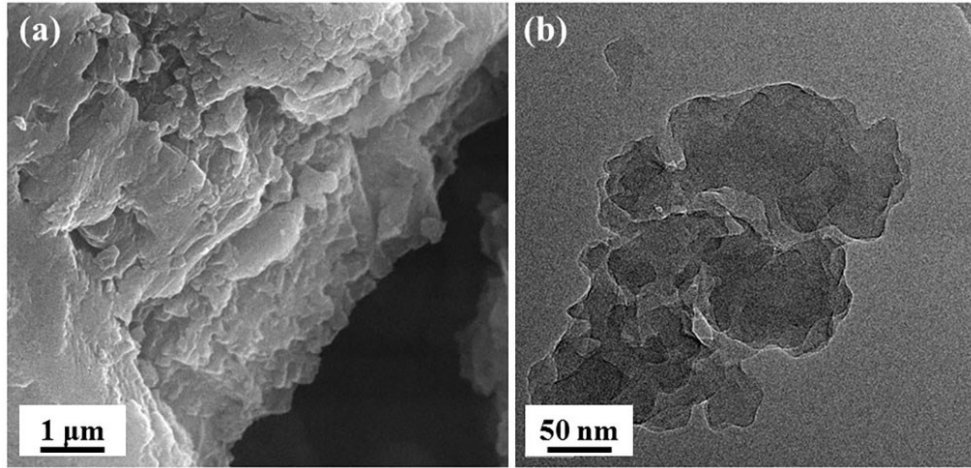

Fig. S3. (a) FESEM and (b) TEM images of CTF-1.

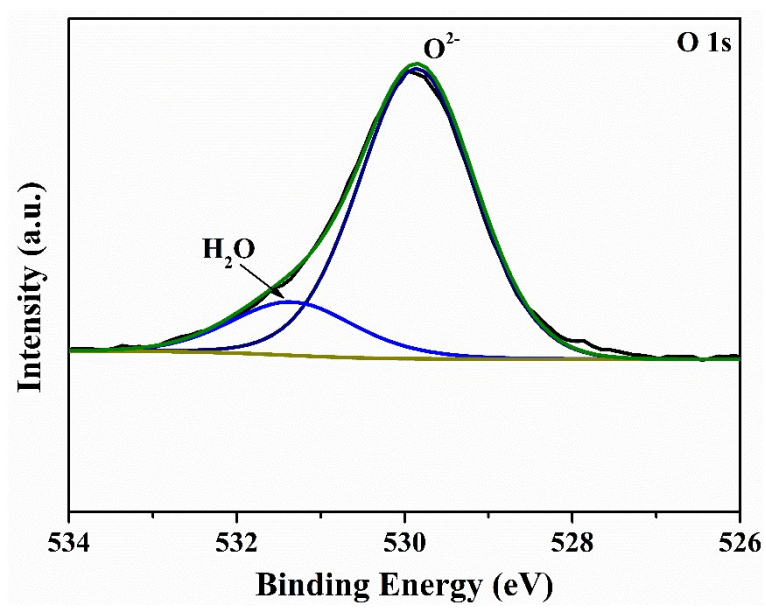

Fig. S4. High-resolution XPS spectra of O 1s for CuCo<sub>2</sub>O<sub>4</sub>/CTF-1<sub>5</sub>.

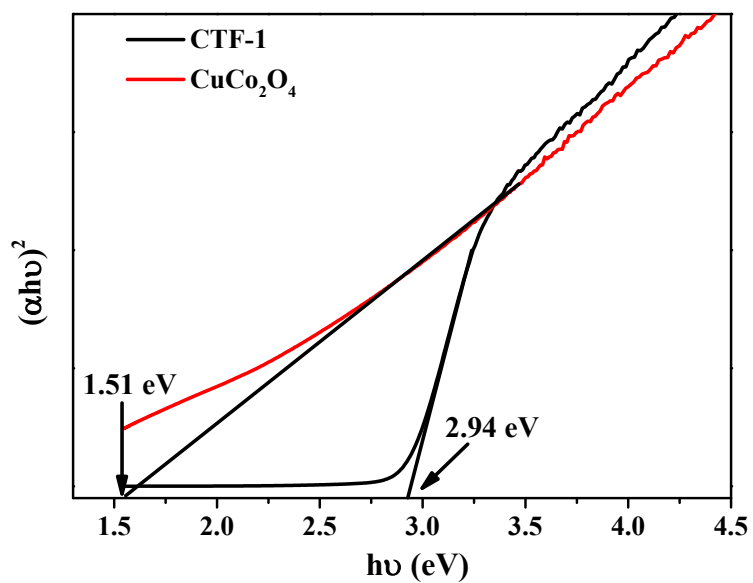

Fig. S5. Band gap determination of CTF-1 and  $\text{CuCo}_2\text{O}_4$ .

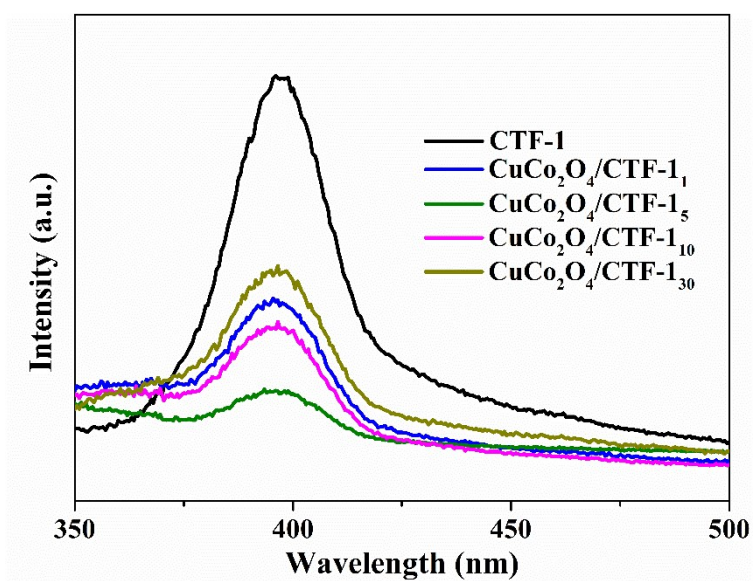

Fig. S6. Photoluminescence spectra of CTF-1 and  $\text{CuCo}_2\text{O}_4/\text{CTF-1}$  composites.

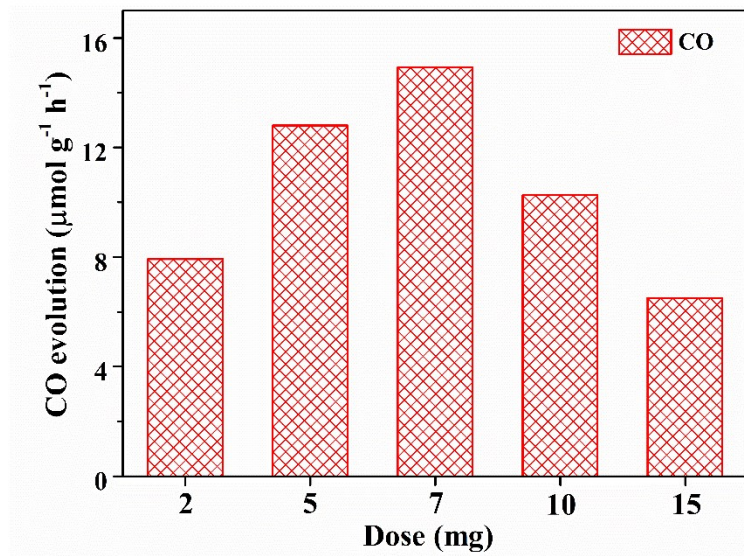

**Fig. S7.** The effect of amounts of the sensitizer ( $\text{Ru}(\text{bpy})_3^{2+}$ ) on the photocatalytic  $\text{CO}_2$  reduction for  $\text{CuCo}_2\text{O}_4/\text{CTF-1}_5$  in 4 h photocatalytic reaction.

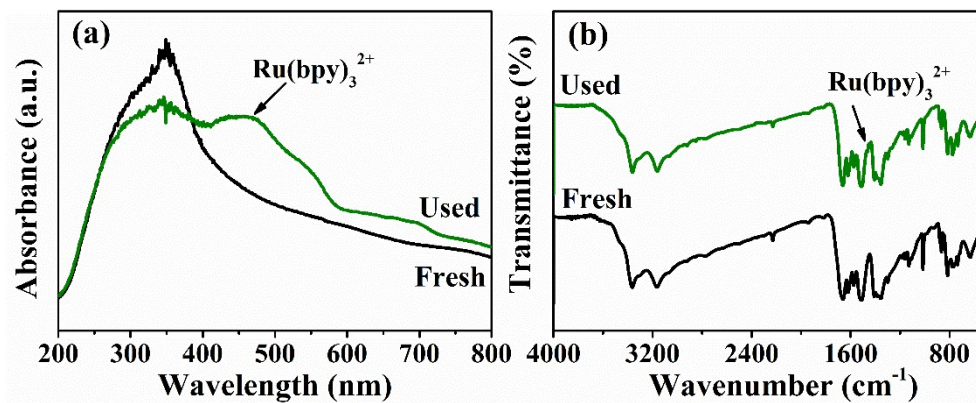

**Fig. S8.** (a) UV-vis diffuse reflectance spectra and (b) FTIR spectra of fresh and used  $\text{CuCo}_2\text{O}_4/\text{CTF-1}_5$ .

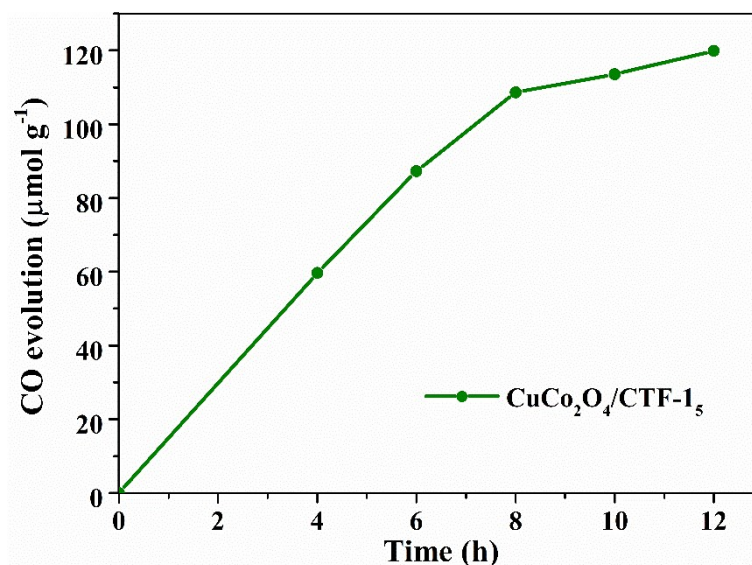

**Fig. S9.** The photocatalytic CO evolution of CuCo<sub>2</sub>O<sub>4</sub>/CTF-1<sub>5</sub> with increasing time.

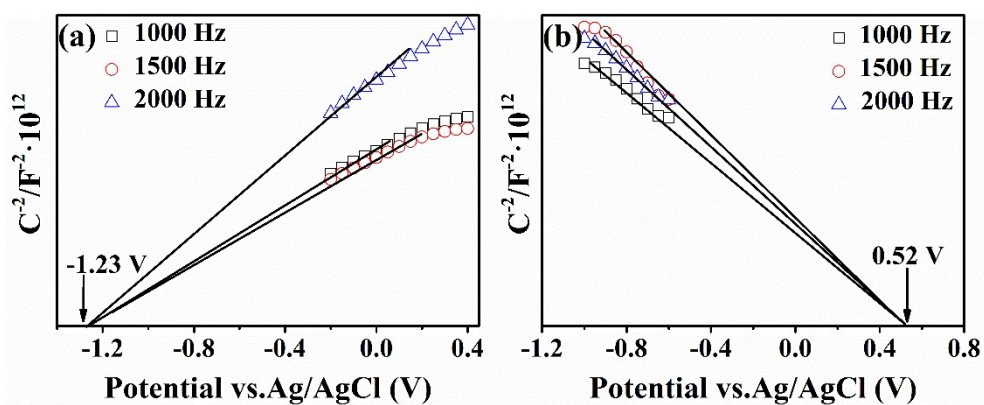

**Fig. S10.** Mott-Schottky plots of (a) CTF-1 and (b) CuCo<sub>2</sub>O<sub>4</sub> obtained at different frequency in an aqueous solution of Na<sub>2</sub>SO<sub>4</sub> (0.20 M).

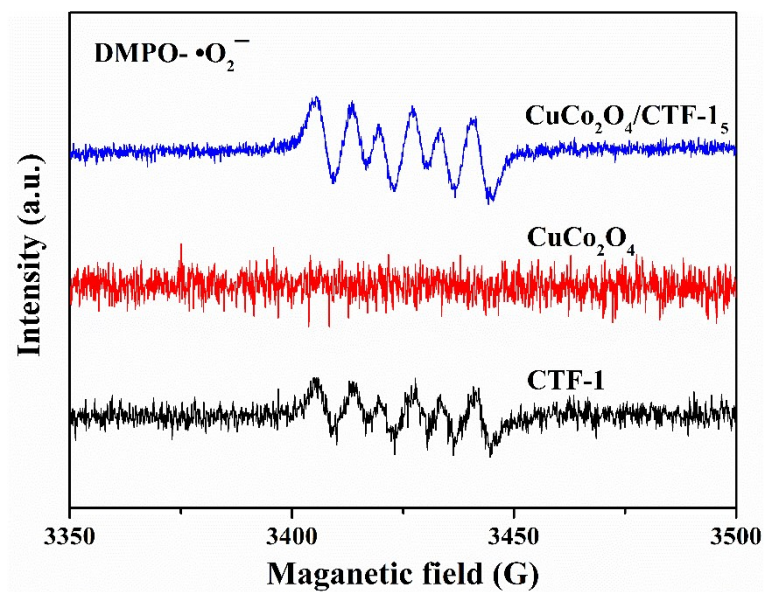

**Fig. S11.** ESR signals of DMPO/•O<sub>2</sub><sup>-</sup> after 10 min of visible light irradiation in methanol dispersion of CTF-1, CuCo<sub>2</sub>O<sub>4</sub> and CuCo<sub>2</sub>O<sub>4</sub>/CTF-1<sub>5</sub>.
